# Supplementary material
Source: PubMed Central journal article supplement (PMC7322316)
Supplement: NIHMS1583445-supplement-Supplemental_Material.pdf [file NIHMS1583445-supplement-Supplemental_Material.pdf]

## **SUPPLEMENTAL DATA**

**Title:** Resting Heart Rate and Chronotropic Response to Exercise: Prognostic Implications in Heart Failure Across Left Ventricular Ejection Fraction Spectrum.

**Authors:**

Mário Santos, MD; Erin West, MSc; Hicham Skali, MD, MSc; Daniel E. Forman MD; Wilson Nadruz Junior, MD; Amil M. Shah, MD, MPH.

**Supplemental table 1** – Maximum guideline directed dose of beta-blocker.

| <b>Beta-blocker</b> | <b>Maximum recommended dose</b> |
|---------------------|---------------------------------|
| Bisoprolol          | 10 mg daily                     |
| Carvedilol          | 25 mg bid                       |
| Metoprolol          | 200 mg daily                    |
| Nebivolol           | 10 mg daily                     |

Legend: bid, twice a day. For those patients on a different beta-blocker (e.g.: atenolol, propranolol) their metoprolol equivalent dose was estimated using the following online conversion calculator: [www.globalrph.com/beta\\_blockers.htm](http://www.globalrph.com/beta_blockers.htm)

**Supplemental table 2** - Multivariable adjusted hazard ratios for incident all-cause death or composite outcome associated with resting heart rate after forcing into the model the eGFR.

|                                                                                                                                        | <b>Hazard Ratio (95% CI)</b>  | <b>Hazard Ratio per 5 bpm increase (95% CI)</b> |
|----------------------------------------------------------------------------------------------------------------------------------------|-------------------------------|-------------------------------------------------|
| <b>Death</b><br>Resting HR ≤ 70 bpm<br>Resting HR > 70 bpm                                                                             | Reference<br>1.59 (1.02-2.49) | 1.07 (1.00-1.14)                                |
| <b>Composite Outcome</b><br>Resting HR ≤ 70 bpm<br>Resting HR > 70 bpm                                                                 | Reference<br>1.58 (1.09-2.30) | 1.06 (1.00-1.12)                                |
| *all analyses adjusted for age, sex, cardiomyopathy etiology, diabetes, LVEF, B-blocker use, presence of CRT/ICD, peak VO <sub>2</sub> |                               |                                                 |

**Supplemental table 3** - Multivariable adjusted hazard ratios for incident death or cardiovascular events associated with resting heart rate and CIx, by peak RER.

|                           | <b>RER &lt;1.0</b>           | <b>RER ≥1.0</b>              |
|---------------------------|------------------------------|------------------------------|
| <b>Resting heart rate</b> | HR 1.08, 95% CI<br>0.90-1.30 | HR 1.04, 95% CI<br>0.99-1.10 |
| <b>CIx</b>                | HR 0.59, 95% CI<br>0.20-1.76 | HR 0.70, 95% CI<br>0.57-0.86 |

Analyses adjusted for age, LVEF, and peak VO<sub>2</sub>
